# Supplementary material for: Sea Urchin Food Waste into Bioactives: Collagen and Polyhydroxynaphtoquinones from P. lividus and S. granularis
Source: MDPI journal article supplement (doi:10.3390/md22040163), 2024-04-03

## SUPPLEMENTARY MATERIALS

**Table S1.** Extraction PHNQs yields. *P. lividus* (*P. l*) and *S. granularis* (*S. g*, P: purple; W: white). The different extractions are numbered and were performed from different batches (*P. lividus*) or from the same batch (*S. granularis*).

| Extraction                 | Extraction yield | Mean% $\pm$ st. dev |
|----------------------------|------------------|---------------------|
| <i>P. l</i> _ 28.03.2023   | 0.08%            | 0.07 $\pm$ 0.02     |
| <i>P. l</i> _ 11.01.2023   | 0.08%            |                     |
| <i>P. l</i> _ 06.07.2022   | 0.04%            |                     |
| <i>P. l</i> _12.04.2022    | 0.09%            |                     |
| <i>P. l</i> _ 10.01.2022   | 0.06%            |                     |
| <i>S. g</i> _ 08.06.2023_P | 0.02%            | 0.033 $\pm$ 0.02    |
| <i>S. g</i> _ 17.05.2023_P | 0.03%            |                     |
| <i>S. g</i> _ 13.02.2023_P | 0.05%            |                     |
| <i>S. g</i> _ 08.06.2023_W | 0.01%            | 0.015 $\pm$ 0.01    |
| <i>S. g</i> _ 17.05.2023_W | 0.02%            |                     |

**Table S2.** Relative ratios of PHNQs in each extraction from the two sea urchin species: *P. lividus* (*P. l*) and *S. granularis* (*S. g*, P: purple; W: white). The different extractions are numbered and were performed from different batches (*P. lividus*) or from the same batch (*S. granularis*)

| Extraction                 | EchA + SpA | SpB | SpD  | SpE  | Echinamine |
|----------------------------|------------|-----|------|------|------------|
| <i>P. l</i> _ 28.03.2023   | 50         | 11  | 0    | 37   | 1.5        |
| <i>P. l</i> _ 11.01.2023   | 23.6       | 73  | 0    | 1.2  | 2.8        |
| <i>P. l</i> _ 06.07.2022   | 26         | 70  | 0    | 1.7  | 0.2        |
| <i>P. l</i> _12.04.2022    | 22         | 72  | 0    | 3.9  | 1.2        |
| <i>P. l</i> _ 10.01.2022   | 92.5       | 7.5 | 0    | 0    | 0          |
| <i>S. g</i> _ 08.06.2023_P | 90.7       | 0   | 4.1  | 4.6  | 0.6        |
| <i>S. g</i> _ 08.06.2023_W | 86         | 0   | 2.8  | 11.2 | 0          |
| <i>S. g</i> _ 17.05.2023_P | 86.4       | 0   | 5.1  | 8    | 0.5        |
| <i>S. g</i> _ 17.05.2023_W | 75.8       | 0   | 1.9  | 21.8 | 0.5        |
| <i>S. g</i> _ 13.02.2023_P | 66.4       | 0   | 18.9 | 14.7 | 0          |

**Table S3.** Comparative table of collagen extraction from the two sea urchin species: *P. lividus* (left) and *S. granularis* (right) weight (g) and diameter (cm) of the peristomial membranes, the collagen extraction yield (%) and the amount of collagen obtained from a single membrane (mg).

|                                    |                                                                                   |                                                                                     |
|------------------------------------|-----------------------------------------------------------------------------------|-------------------------------------------------------------------------------------|
| Sea urchin species                 | 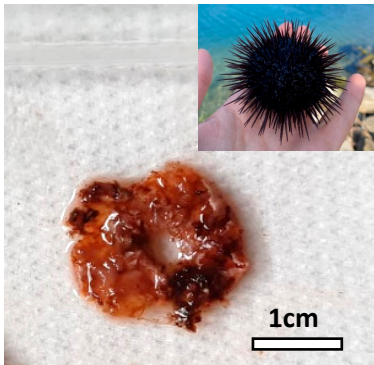 |  |
| Average single membrane weight (g) | 0.09 g                                                                            | 0.4 g                                                                               |
| Membrane diameter (cm)             | 2 cm                                                                              | 3 cm                                                                                |
| Extraction yield (%)               | 10.34 ± 2.5 %                                                                     | 6 %                                                                                 |
| Collagen from 1 membrane (mg)      | 7.75 ± 1.3 mg                                                                     | 17 mg                                                                               |

**Table S4.** Kruskal-Wallis + Dunn test results of degradation kinetics in PBS at 1 day and 10 days. Values are significant at  $p < 0.05$ .

| Time point | Comparison - PBS                            | p value |
|------------|---------------------------------------------|---------|
| 1 day      | <i>P. lividus</i> / <i>S. granularis</i>    | 0.002   |
| 1 day      | <i>P. lividus</i> / <i>P. lividus</i> UV    | 0.096   |
| 1 day      | <i>S. granularis</i> / <i>P. lividus</i> UV | 0.169   |
| 10 day     | <i>P. lividus</i> / <i>S. granularis</i>    | 0.029   |
| 10 day     | <i>P. lividus</i> / <i>P. lividus</i> UV    | 0.010   |
| 10 day     | <i>S. granularis</i> / <i>P. lividus</i> UV | 0.692   |

**Table S5.** Kruskal-Wallis + Dunn test results of degradation kinetics in collagenase at 6 h. Values are significant at  $p < 0.05$ .

| Time point | Comparison - collagenase                    | p value |
|------------|---------------------------------------------|---------|
| 6 h        | <i>P. lividus</i> / <i>S. granularis</i>    | 0.433   |
| 6 h        | <i>P. lividus</i> / <i>P. lividus</i> UV    | 0.006   |
| 6 h        | <i>S. granularis</i> / <i>P. lividus</i> UV | 0.049   |

**Table S6.** Results of Kruskal-Wallis + Dunn and Mann-Whitney tests used to compare stiffness under different conditions. Only significant values with  $p < 0.05$  are shown. RT: room temperature, RH: relative humidity

| Statistic test             | Conditions     | Comparison – compressive stress             | p value |
|----------------------------|----------------|---------------------------------------------|---------|
| Mann - Whitney             | RT/ 80% RH     | <i>P. lividus</i> / <i>P. lividus</i>       | 0.012   |
| Kruskal Wallis + Dunn test | RT/ RT         | <i>P. lividus</i> / <i>P. lividus</i> UV    | 0.028   |
| Kruskal Wallis + Dunn test | RT/ RT         | <i>S. granularis</i> / <i>P. lividus</i> UV | 0.002   |
| Kruskal Wallis + Dunn test | 80% RH/ 80% RH | <i>P. lividus</i> / <i>S. granularis</i>    | 0.039   |
| Kruskal Wallis + Dunn test | 80% RH/ 80% RH | <i>S. granularis</i> / <i>P. lividus</i> UV | 0.015   |

**Figure S1** - ESI-HRMS spectrum of spE ( $m/z=252.9988$ ,  $[M-H]^-$ )

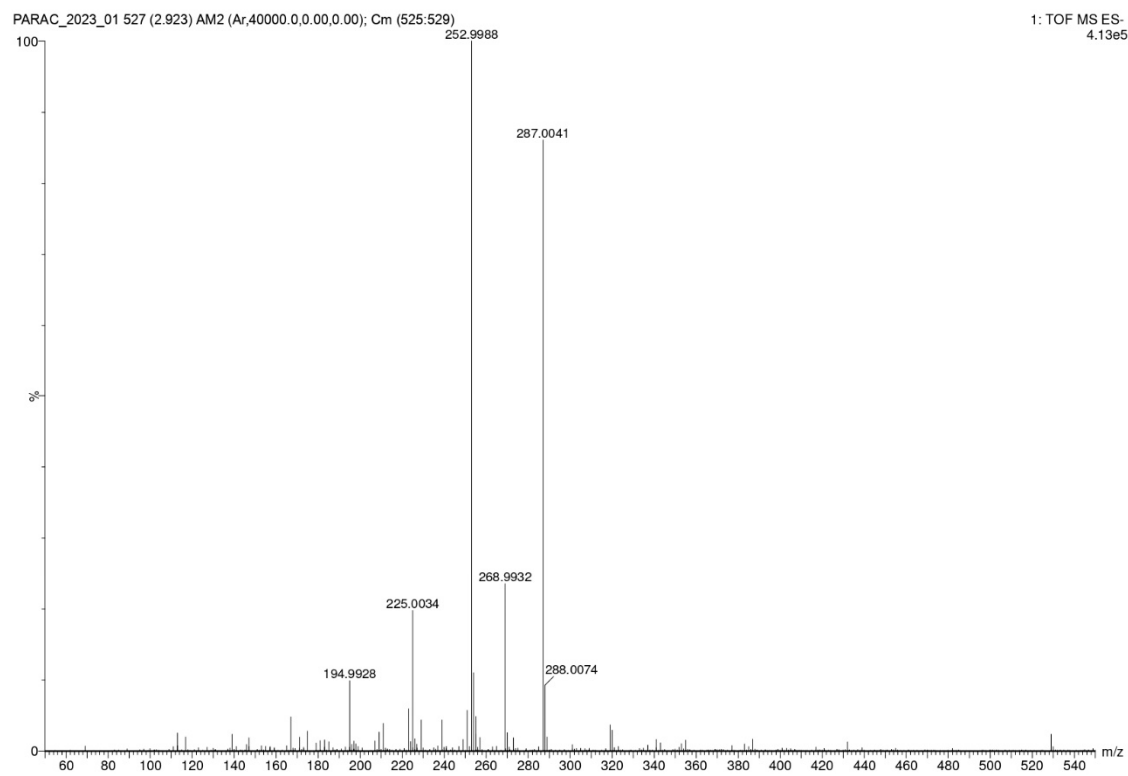

**Figure S2** - ESI-HRMS spectrum of spB ( $m/z=221.0085$ ,  $[M-H]^-$ )

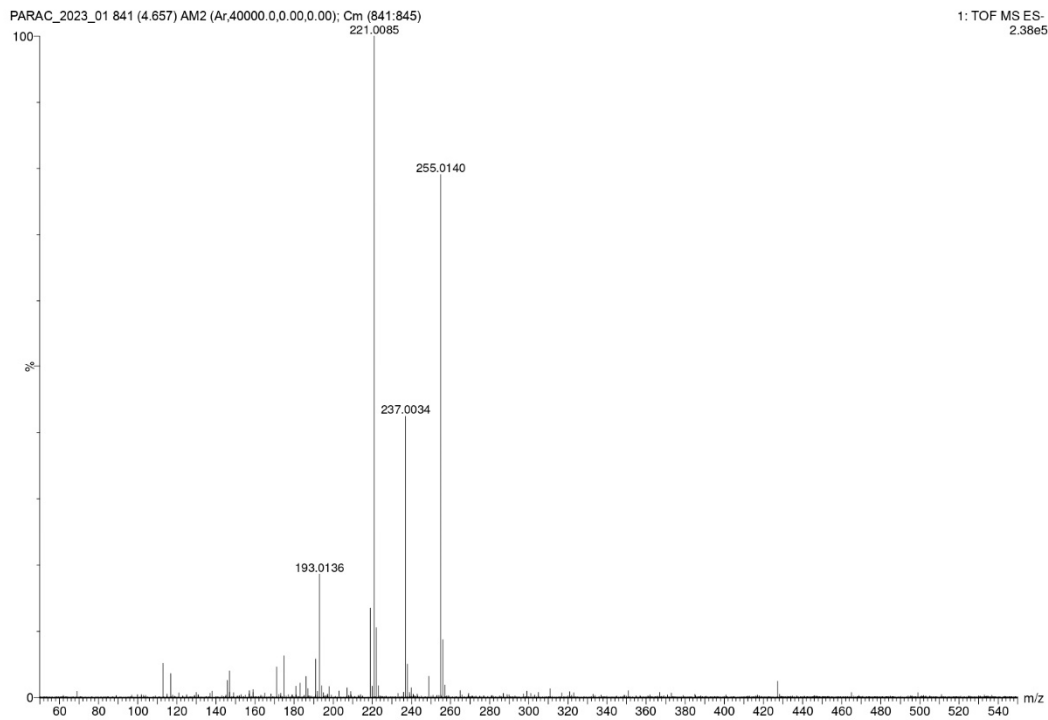

**Figure S3** - ESI-HRMS spectrum of spA ( $m/z=263.0190$ ,  $[M-H]^-$ )

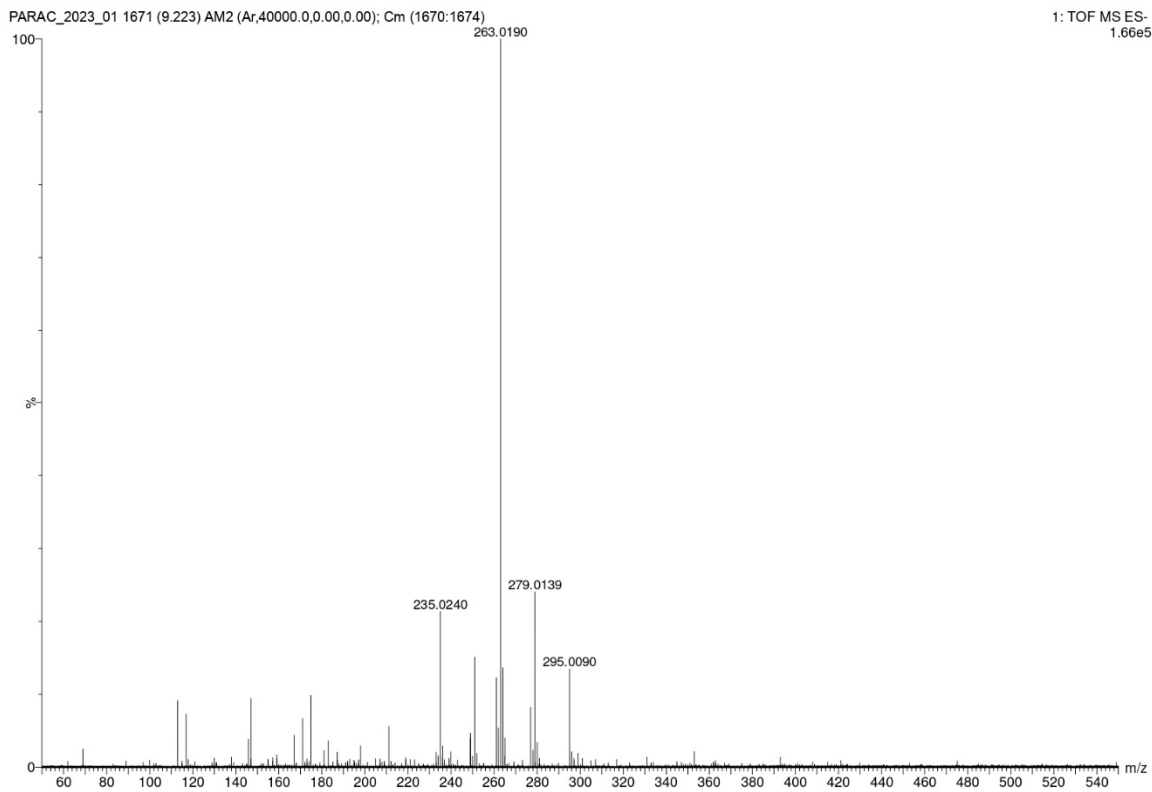

**Figure S4** - ESI-HRMS spectrum of EchA ( $m/z=265.0350$ ,  $[M-H]^-$ )

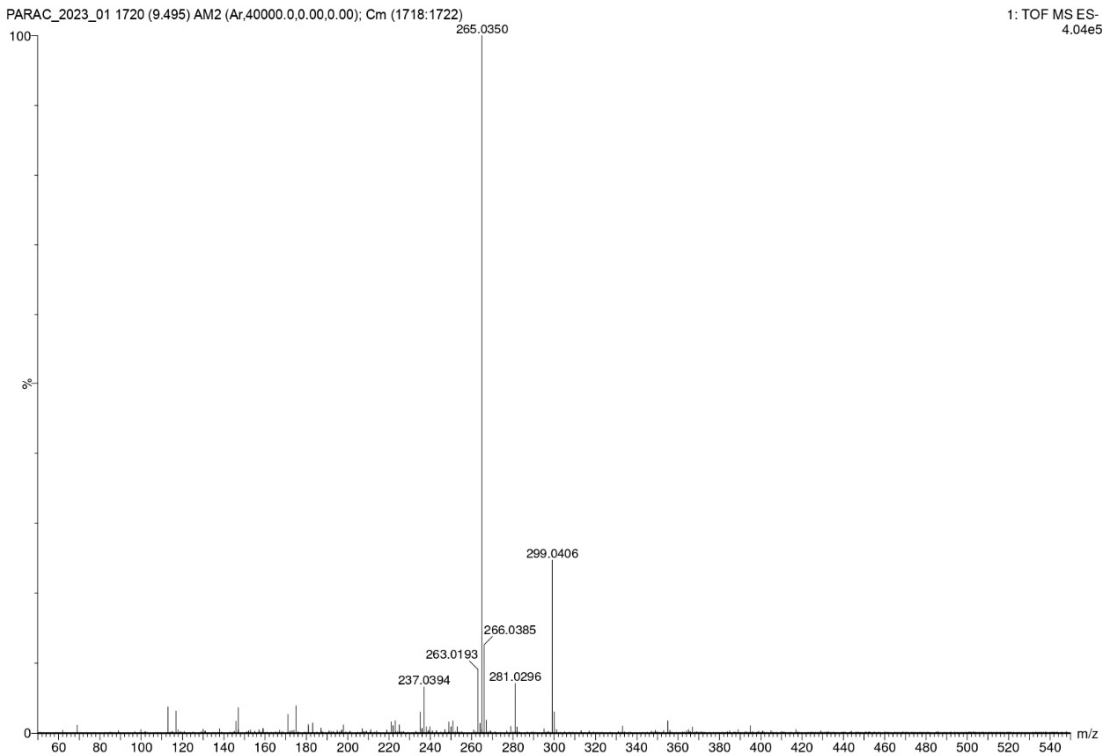

**Figure S5** - ESI-HRMS spectrum of spD ( $m/z=237.0032$ ,  $[M-H]^-$ )

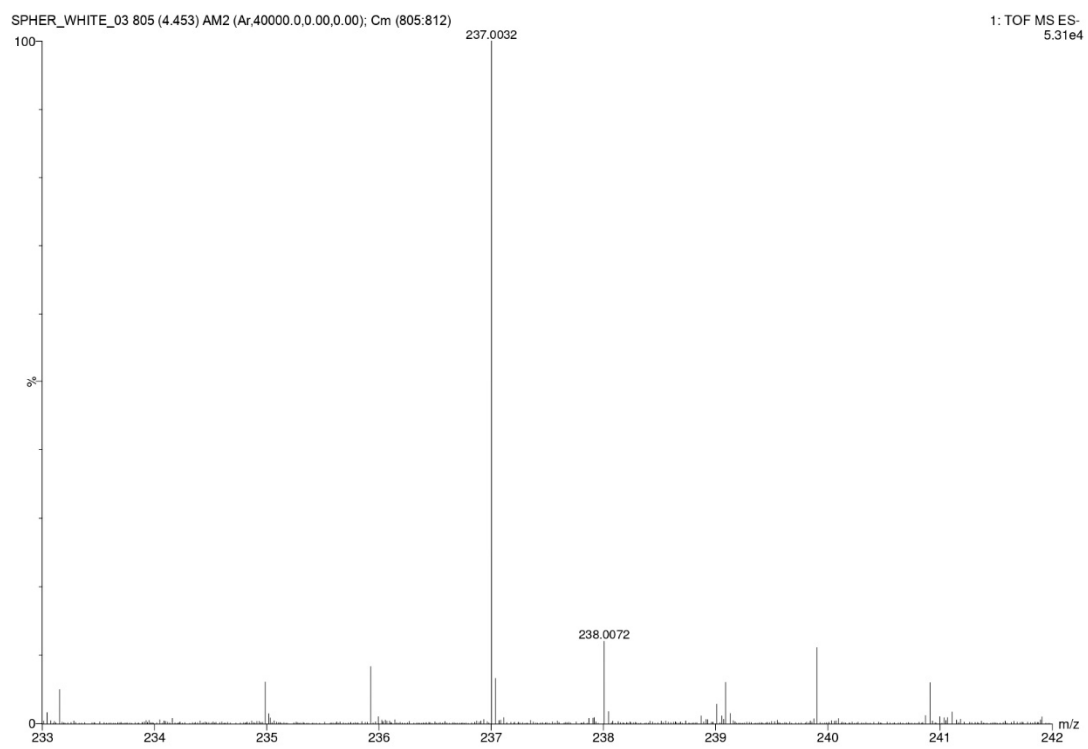

**Figure S6** - ESI-HRMS spectrum of echinamine ( $m/z=252.0145$ ,  $[M-H]^+$ )

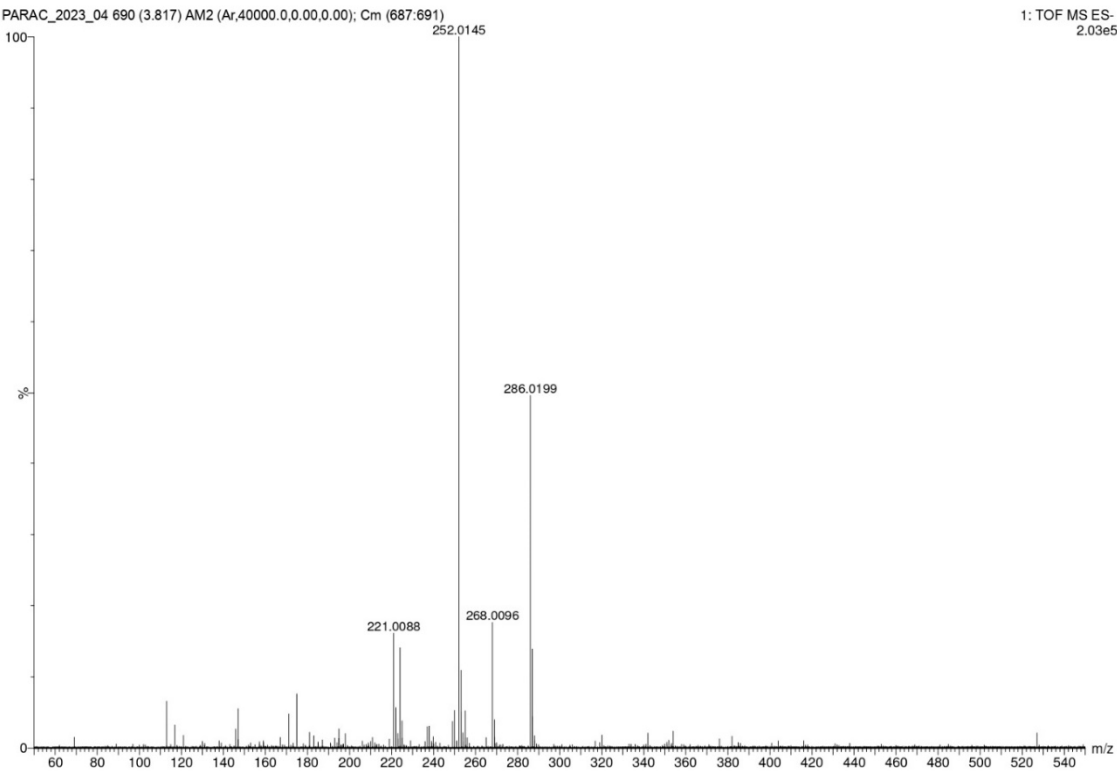

Supplement: s1 [file s1]
